# Supplementary material
Source: Frontiers journal article supplement (https://www.frontiersin.org/articles/22383)
Supplement: Data_Sheet_2.XLSX [file Data_Sheet_2.XLSX]

## Sheet: gos-metadata
"Sample Dataset"	SAMPLE_ACC	NUM_OF_READS	Filename	"File Size"	"Habitat Type"	"Geographic Location"	"Sample Location"	Country	"Filter Size"	Latitude	Longitude	LAT	LON	Depth	"Wat. Dep."	Chlorophyll	Salin.	Temp	"Coll. Date"	"Habitat Type"	Niche	Fe(nM)	Label	Rusch-etal-grps	Climate Group	Ocean Basin	Climate - Ocean Basin - Niche	Climate - Niche	Ocean Basin - Niche
GS000b	JCVI_SMPL_1103283000002	132277	JCVI_SMPL_1103283000002_p.seq	"541.6 MB"	"Open Ocean"	"Sargasso Sea"	"Sargasso Station 13"	Bermuda	"0.22 - 0.8"	"31 10 30"	"64 19 27.6"	31.175	64.3243	"5 "	">4200 m"	"0.17 ug/kg"	"36.6 psu"	"20 C"	2003-02-26	"Open Ocean"	ooc	0.35	GS000b-ooc-5	Sargasso	tro	NA	troNA-ooc	troooc	Atlantic-open ocean
GS000c	JCVI_SMPL_1103283000003	192643	JCVI_SMPL_1103283000003_p.seq	"628 MB"	"Open Ocean"	"Sargasso Sea"	"Sargasso Stations 3"	Bermuda	"0.22 - 0.8"	"32 10 29.4"	"64 00 36.6"	32.1748	64.0102	"5 "	">4200 m"	"0.17 ug/kg"	"36.7 psu"	"19.8 C"	2003-02-25	"Open Ocean"	ooc	0.35	GS000c-ooc-5	Sargasso	tro	NA	troNA-ooc	troooc	Atlantic-open ocean
GS000d	JCVI_SMPL_1103283000004	164570	JCVI_SMPL_1103283000004_p.seq	"566.8 MB"	"Open Ocean"	"Sargasso Sea"	"Sargasso Station 13"	Bermuda	"0.22 - 0.8"	"31 10 30"	"64 19 27.6"	31.175	64.3243	"5 "	">4200 m"	"0.17 ug/kg"	"36.6 psu"	"20 C"	2003-02-26	"Open Ocean"	ooc	0.35	GS000d-ooc-5	Sargasso	tro	NA	troNA-ooc	troooc	Atlantic-open ocean
GS001c	JCVI_SMPL_1103283000007	92351	JCVI_SMPL_1103283000007_p.seq	"156.8 MB"	"Open Ocean"	"Sargasso Sea"	"Hydrostation S"	Bermuda	"0.1 - 0.8"	"32 10 00"	"64 30 00"	32.1667	64.5	"5 "	">4200 m"	"0.10 ug/kg"	"36.7 psu"	"22.9 C"	2003-05-15	"Open Ocean"	ooc	0.35	GS001c-ooc-5		tro	NA	troNA-ooc	troooc	Atlantic-open ocean
GS002	JCVI_SMPL_1103283000008	121590	JCVI_SMPL_1103283000008_p.seq	"150.2 MB"	Coastal	"North American East Coast"	"Gulf of Maine"	Canada	"0.1 - 0.8"	"42 30 11"	"67 14 24"	42.5031	67.24	"1 "	"106 m"	"1.4 ug/kg"	"29.2 psu"	"18.2 C"	2003-08-21	Coastal	coa	0.26	GS002-coa-1	TempNort	tem	NA	temNA-coa	temcoa	Atlantic-coastal
GS003	JCVI_SMPL_1103283000009	61605	JCVI_SMPL_1103283000009_p.seq	"108.4 MB"	Coastal	"North American East Coast"	"Browns Bank Gulf of Maine"	Canada	"0.1 - 0.8"	"42 51 10"	"66 13 2"	42.8528	66.2172	"1 "	"119 m"	"1.4 ug/kg"	"29.9 psu"	"11.7 C"	2003-08-21	Coastal	coa	0.26	GS003-coa-1	TempNort	tem	NA	temNA-coa	temcoa	Atlantic-coastal
GS004	JCVI_SMPL_1103283000010	52959	JCVI_SMPL_1103283000010_p.seq	"92.8 MB"	Coastal	"North American East Coast"	"Outside Halifax Nova Scotia"	Canada	"0.1 - 0.8"	"44 8 14"	"63 38 40"	44.1372	63.6444	"2 "	"142 m"	"0.4 ug/kg"	"28.3 psu"	"17.3 C"	2003-08-22	Coastal	coa	0.16	GS004-coa-2	TempNort	tem	NA	temNA-coa	temcoa	Atlantic-coastal
GS007	JCVI_SMPL_1103283000013	50980	JCVI_SMPL_1103283000013_p.seq	"89.7 MB"	Coastal	"North American East Coast"	"Northern Gulf of Maine"	Canada	"0.1 - 0.8"	"43 37 56"	"66 50 50"	43.6322	66.8472	"1 "	"139 m"	"1.4 ug/kg"	"31.7 psu"	"17.9 C"	2003-08-25	Coastal	coa	0.22	GS007-coa-1	TempNort	tem	NA	temNA-coa	temcoa	Atlantic-coastal
GS008	JCVI_SMPL_1103283000014	129655	JCVI_SMPL_1103283000014_p.seq	"160.6 MB"	Coastal	"North American East Coast"	"Newport Harbor RI"	USA	"0.1 - 0.8"	"41 29 9"	"71 21 4"	41.4858	71.3511	"1 "	"12 m"	"2.2 ug/kg"	"26.5 psu"	"9.4 C"	2003-11-17	Coastal	coa	0.15	GS008-coa-1	TempSout	tem	NA	temNA-coa	temcoa	Atlantic-coastal
GS009	JCVI_SMPL_1103283000015	79303	JCVI_SMPL_1103283000015_p.seq	"98.6 MB"	Coastal	"North American East Coast"	"Block Island, NY"	USA	"0.1 - 0.8"	"41 5 28"	"71 36 8"	41.0911	71.6022	"1 "	"32 m"	"4.0 ug/kg"	"31 psu"	"11 C"	2003-11-17	Coastal	coa	0.15	GS009-coa-1	TempSout	tem	NA	temNA-coa	temcoa	Atlantic-coastal
GS010	JCVI_SMPL_1103283000016	78304	JCVI_SMPL_1103283000016_p.seq	"96.2 MB"	Coastal	"North American East Coast"	"Cape May, NJ"	USA	"0.1 - 0.8"	"38 56 24"	"74 41 6"	38.94	74.685	"1 "	"10 m"	"2.0 ug/kg"	"31 psu"	"12 C"	2003-11-18	Coastal	coa	0.18	GS010-coa-1	TempSout	tem	NA	temNA-coa	temcoa	Atlantic-coastal
GS013	JCVI_SMPL_1103283000019	138033	JCVI_SMPL_1103283000019_p.seq	"173.8 MB"	Coastal	"North American East Coast"	"Off Nags Head, NC"	USA	"0.1 - 0.8"	"36 0 14"	"75 23 41"	36.0039	75.3947	"2.1 "	"20 m"	"3.0 ug/kg"	&nbsp;	"9.3 C"	2003-12-19	Coastal	coa	0.17	GS013-coa-2.1	TempSout	tem	NA	temNA-coa	temcoa	Atlantic-coastal
GS014	JCVI_SMPL_1103283000020	128885	JCVI_SMPL_1103283000020_p.seq	"163 MB"	Coastal	"North American East Coast"	"South of Charleston, SC"	USA	"0.1 - 0.8"	"32 30 25"	"79 15 50"	32.5069	79.2639	"1 "	"31 m"	"1.70 ug/kg"	&nbsp;	"18.6 C"	2003-12-21	Coastal	coa	0.33	GS014-coa-1	TropGala	tro	NA	troNA-coa	trocoa	Atlantic-coastal
GS015	JCVI_SMPL_1103283000021	127362	JCVI_SMPL_1103283000021_p.seq	"160.9 MB"	Coastal	"Caribbean Sea"	"Off Key West, FL"	USA	"0.1 - 0.8"	"24 29 18"	"83 4 12"	24.4883	83.07	"1.7 "	"47 m"	"0.2 ug/kg"	"36 psu"	"25 C"	2004-01-08	Coastal	ooc	0.32	GS015-coa-1.7	TropOoc	tro	NA	troNA-ooc	troooc	Atlantic-open ocean
GS016	JCVI_SMPL_1103283000022	127122	JCVI_SMPL_1103283000022_p.seq	"160.3 MB"	"Coastal Sea"	"Caribbean Sea"	"Gulf of Mexico"	USA	"0.1 - 0.8"	"24 10 29"	"84 20 40"	24.1747	84.3444	"2 "	"3333 m"	"0.16 ug/kg"	"35.8 psu"	"26.4 C"	2004-01-08	"Coastal Sea"	ooc	0.31	GS016-coa-2	TropOoc	tro	NA	troNA-ooc	troooc	Atlantic-open ocean
GS017	JCVI_SMPL_1103283000023	257581	JCVI_SMPL_1103283000023_p.seq	"455.7 MB"	"Open Ocean"	"Caribbean Sea"	"Yucatan Channel"	Mexico	"0.1 - 0.8"	"20 31 21"	"85 24 49"	20.5225	85.4136	"2 "	"4513 m"	"0.13 ug/kg"	"35.8 psu"	"27 C"	2004-01-09	"Open Ocean"	ooc	0.3	GS017-ooc-2	TropOoc	tro	NA	troNA-ooc	troooc	Atlantic-open ocean
GS018	JCVI_SMPL_1103283000024	142743	JCVI_SMPL_1103283000024_p.seq	"253.6 MB"	"Open Ocean"	"Caribbean Sea"	"Rosario Bank"	Honduras	"0.1 - 0.8"	"18 2 12"	"83 47 5"	18.0367	83.7847	"1.7 "	"4470 m"	"0.14 ug/kg"	"35.4 psu"	"27.4 C"	2004-01-10	"Open Ocean"	ooc	0.29	GS018-ooc-1.7	TropOoc	tro	NA	troNA-ooc	troooc	Atlantic-open ocean
GS019	JCVI_SMPL_1103283000025	135325	JCVI_SMPL_1103283000025_p.seq	"238.1 MB"	Coastal	"Caribbean Sea"	"Northeast of Colon"	Panama	"0.1 - 0.8"	"10 42 59"	"80 15 16"	10.7164	80.2544	"1.7 "	"3336 m"	"0.23 ug/kg"	"35.4 psu"	"27.7 C"	2004-01-12	Coastal	ooc	0.32	GS019-coa-1.7	TropOoc	tro	NA	troNA-ooc	troooc	Atlantic-open ocean
GS021	JCVI_SMPL_1103283000027	131798	JCVI_SMPL_1103283000027_p.seq	"232.7 MB"	Coastal	"Eastern Tropical Pacific"	"Gulf of Panama"	Panama	"0.1 - 0.8"	"8 7 45"	"79 41 28"	8.12917	79.6911	"1.6 "	"76 m"	"0.50 ug/kg"	"30.7 psu"	"27.6 C"	2004-01-20	Coastal	coa	0	GS021-coa-1.6	TropGala	tro	SPA	troSPA-coa	trocoa	Pacific-coastal
GS022	JCVI_SMPL_1103283000028	121662	JCVI_SMPL_1103283000028_p.seq	"213.5 MB"	"Open Ocean"	"Eastern Tropical Pacific"	"250 miles from Panama City"	Panama	"0.1 - 0.8"	"6 29 34"	"82 54 14"	6.49278	82.9039	"2 "	"2431 m"	"0.33 ug/kg"	"32.3 psu"	"29.3 C"	2004-01-21	"Open Ocean"	ooc	0.08	GS022-ooc-2	TropGala	tro	SPA	troSPA-ooc	troooc	Pacific-open ocean
GS023	JCVI_SMPL_1103283000029	133051	JCVI_SMPL_1103283000029_p.seq	"234.8 MB"	"Open Ocean"	"Eastern Tropical Pacific"	"30 miles from Cocos Island"	"Costa Rica"	"0.1 - 0.8"	"5 38 24"	"86 33 55"	5.64	86.5653	"2 "	"1139 m"	"0.07 ug/kg"	"32.6 psu"	"28.7 C"	2004-01-22	"Open Ocean"	ooc	0.08	GS023-ooc-2	TropOoc	tro	SPA	troSPA-ooc	troooc	Pacific-open ocean
GS026	JCVI_SMPL_1103283000031	101424	JCVI_SMPL_1103283000031_p.seq	"178.9 MB"	"Open Ocean"	"Galapagos Islands"	"134 miles NE of Galapagos"	Ecuador	"0.1 - 0.8"	"1 15 51"	"90 17 42"	1.26417	90.295	"2 "	"2386 m"	"0.22 ug/kg"	"32.6 psu"	"27.8 C"	2004-02-02	"Open Ocean"	ooc	0.07	GS026-ooc-2	TropOoc	tro	SPA	troSPA-ooc	troooc	Pacific-open ocean
GS027	JCVI_SMPL_1103283000032	222080	JCVI_SMPL_1103283000032_p.seq	"388.3 MB"	Coastal	"Galapagos Islands"	"Devil s Crown, Floreana Island"	Ecuador	"0.1 - 0.8"	"1 12 58"	"90 25 22"	1.21611	90.4228	"2.2 "	"2.3 m"	"0.40 ug/kg"	"34.9 psu"	"25.5 C"	2004-02-04	Coastal	coa	0.07	GS027-coa-2.2	TropGala	tro	SPA	troSPA-coa	trocoa	Pacific-coastal
GS028	JCVI_SMPL_1103283000033	189052	JCVI_SMPL_1103283000033_p.seq	"333.4 MB"	Coastal	"Galapagos Islands"	"Coastal Floreana"	Ecuador	"0.1 - 0.8"	"1 13 1"	"90 19 11"	1.21694	90.3197	"2 "	"156 m"	"0.35 ug/kg"	&nbsp;	&nbsp;	2004-02-05	Coastal	coa	0.07	GS028-coa-2	TropGala	tro	SPA	troSPA-coa	trocoa	Pacific-coastal
GS029	JCVI_SMPL_1103283000034	131529	JCVI_SMPL_1103283000034_p.seq	"233.1 MB"	Coastal	"Galapagos Islands"	"North James Bay, Santigo Island"	Ecuador	"0.1 - 0.8"	"0 12 0"	"90 50 7"	0.2	90.8353	"2.1 "	"12 m"	"0.40 ug/kg"	"34.5 psu"	"26.2 C"	2004-02-09	Coastal	coa	0.08	GS029-coa-2.1	TropGala	tro	SPA	troSPA-coa	trocoa	Pacific-coastal
GS034	JCVI_SMPL_1103283000039	134347	JCVI_SMPL_1103283000039_p.seq	"233.6 MB"	Coastal	"Galapagos Islands"	"North Seamore Island"	Ecuador	"0.1 - 0.8"	"0 22 59"	"90 16 47"	0.383056	90.2797	"2.1 "	"35 m"	"0.36 ug/kg"	&nbsp;	"27.5 C"	2004-02-20	Coastal	coa	0.08	GS034-coa-2.1	TropGala	tro	SPA	troSPA-coa	trocoa	Pacific-coastal
GS035	JCVI_SMPL_1103283000040	140814	JCVI_SMPL_1103283000040_p.seq	"247 MB"	Coastal	"Galapagos Islands"	"Wolf Island"	Ecuador	"0.1 - 0.8"	"1 23 21"	"91 49 1"	1.38917	91.8169	"1.7 "	"71 m"	"0.28 ug/kg"	"34.5 psu"	"21.8 C"	2004-03-02	Coastal	coa	0.08	GS035-coa-1.7	TropGala	tro	SPA	troSPA-coa	trocoa	Pacific-coastal
GS036	JCVI_SMPL_1103283000041	77538	JCVI_SMPL_1103283000041_p.seq	"138 MB"	Coastal	"Galapagos Islands"	"Cabo Marshall, Isabella Island"	Ecuador	"0.1 - 0.8"	"0 1 15"	"91 11 52"	0.0208333	91.1978	"2.1 "	"67 m"	"0.65 ug/kg"	"34.6 psu"	"25.8 C"	2004-03-02	Coastal	coa	0.08	GS036-coa-2.1	TropGala	tro	SPA	troSPA-coa	trocoa	Pacific-coastal
GS037	JCVI_SMPL_1103283000042	65670	JCVI_SMPL_1103283000042_p.seq	"80.2 MB"	"Open Ocean"	"Eastern Tropical Pacific"	"Equatorial Pacific TAO Buoy"	International	"0.1 - 0.8"	"1 58 26"	"95 0 53"	1.97389	95.0147	"1.8 "	"3334 m"	"0.21 ug/kg"	&nbsp;	"28 C"	2004-03-18	"Open Ocean"	ooc	0.08	GS037-ooc-1.8	TropGala	tro	SPA	troSPA-ooc	troooc	Pacific-open ocean
GS047	JCVI_SMPL_1103283000052	66023	JCVI_SMPL_1103283000052_p.seq	"80.3 MB"	"Open Ocean"	"Tropical South Pacific"	"201 miles from F. Polynesia"	"French Polynesia"	"0.1 - 0.8"	"10 7 53"	"135 26 58"	10.1314	135.449	"30 "	"2400 m"	&nbsp;	"37.3 psu"	"28.6 C"	2004-03-29	"Open Ocean"	ooc	0.07	GS047-ooc-30	TropGala	tro	SPA	troSPA-ooc	troooc	Pacific-open ocean

## Sheet: model-dFe-comparison
GOS station	PELAGOS dFe (nM)	NEMO-PISCES dFe (nM)		Climate groups	Climate-Ocean-Niche
GS001	0.35	0.932	ooc	tro	troNA-ooc
GS002	0.26	1.308	coa	tem	temNA-coa
GS003	0.26	1.255	coa	tem	temNA-coa
GS007	0.22	1.35	coa	tem	temNA-coa
GS013	0.17	1.597	coa	tem	temNA-coa
GS014	0.33	1.736	coa	tro	troNA-coa
GS015	0.32	1.705	ooc	tro	troNA-ooc
GS016	0.31	1.69	ooc	tro	troNA-ooc
GS017	0.3	1.622	ooc	tro	troNA-ooc
GS018	0.29	1.495	ooc	tro	troNA-ooc
GS019	0.32	1.833	ooc	tro	troNA-ooc
GS022	0.08	0.23	ooc	tro	troSPA-ooc
GS023	0.08	0.043	ooc	tro	troSPA-ooc
GS026	0.07	0.017	ooc	tro	troSPA-ooc
GS027	0.07	0.022	coa	tro	troSPA-coa
GS028	0.07	0.022	coa	tro	troSPA-coa
GS029	0.08	0.021	coa	tro	troSPA-coa
GS034	0.08	0.021	coa	tro	troSPA-coa
GS035	0.08	0.016	coa	tro	troSPA-coa
GS036	0.08	0.021	coa	tro	troSPA-coa
GS037	0.08	0.022	ooc	tro	troSPA-ooc
GS047	0.07	0.004	ooc	tro	troSPA-ooc

## Sheet: SIMPER-TemCoa-TroCoa
	Group trocoa	Group temcoa
Species	Av.Abund	Av.Abund	Diss/SD
Heme TBDT uptake
HmuT	1.04	0	1.47
HmuU	0.74	0.31	1.31
HmuV	0.26	0.53	1.13
Catecholate siderophore uptake
btuF	0	0.26	0.77
Fe3+ transporters
idia	1.55	1.43	1.32
hitB	0.65	0	0.9
fbpA	0.48	0.26	1.02
Fe2+ transporters
feoB	0.91	1.67	1.43
FeoA	0.57	1.38	1.56
zupt	1.24	1.25	1.21
Regulatory elements
fur	3.73	3.34	1.35
dtxR	1.37	0.96	1.17
Storage
ferritin-dps	1.36	1.69	1.16
fred	1.58	2	1.47
isiB	1.16	0.36	1.48
isiA	0.92	0.17	1.04

## Sheet: Sheet1
Sam	Niche	Fe(nM)	Label	Rusch-etal-grps	Climate Group	Ocean Basin	Climate - Ocean Basin - Niche	Climate - Niche	Ocean Basin - Niche
GS000b	ooc	0.35	GS000b-ooc-5	Sargasso	tro	NA	troNA-ooc	troooc	Atlantic-open ocean
GS000c	ooc	0.35	GS000c-ooc-5	Sargasso	tro	NA	troNA-ooc	troooc	Atlantic-open ocean
GS000d	ooc	0.35	GS000d-ooc-5	Sargasso	tro	NA	troNA-ooc	troooc	Atlantic-open ocean
GS001c	ooc	0.35	GS001c-ooc-5		tro	NA	troNA-ooc	troooc	Atlantic-open ocean
GS002	coa	0.26	GS002-coa-1	TempNort	tem	NA	temNA-coa	temcoa	Atlantic-coastal
GS003	coa	0.26	GS003-coa-1	TempNort	tem	NA	temNA-coa	temcoa	Atlantic-coastal
GS004	coa	0.16	GS004-coa-2	TempNort	tem	NA	temNA-coa	temcoa	Atlantic-coastal
GS007	coa	0.22	GS007-coa-1	TempNort	tem	NA	temNA-coa	temcoa	Atlantic-coastal
GS008	coa	0.15	GS008-coa-1	TempSout	tem	NA	temNA-coa	temcoa	Atlantic-coastal
GS009	coa	0.15	GS009-coa-1	TempSout	tem	NA	temNA-coa	temcoa	Atlantic-coastal
GS010	coa	0.18	GS010-coa-1	TempSout	tem	NA	temNA-coa	temcoa	Atlantic-coastal
GS013	coa	0.17	GS013-coa-2.1	TempSout	tem	NA	temNA-coa	temcoa	Atlantic-coastal
GS014	coa	0.33	GS014-coa-1	TropGala	tro	NA	troNA-coa	trocoa	Atlantic-coastal
GS015	ooc	0.32	GS015-coa-1.7	TropOoc	tro	NA	troNA-ooc	troooc	Atlantic-open ocean
GS016	ooc	0.31	GS016-coa-2	TropOoc	tro	NA	troNA-ooc	troooc	Atlantic-open ocean
GS017	ooc	0.3	GS017-ooc-2	TropOoc	tro	NA	troNA-ooc	troooc	Atlantic-open ocean
GS018	ooc	0.29	GS018-ooc-1.7	TropOoc	tro	NA	troNA-ooc	troooc	Atlantic-open ocean
GS019	ooc	0.32	GS019-coa-1.7	TropOoc	tro	NA	troNA-ooc	troooc	Atlantic-open ocean
GS021	coa	0	GS021-coa-1.6	TropGala	tro	SPA	troSPA-coa	trocoa	Pacific-coastal
GS022	ooc	0.08	GS022-ooc-2	TropGala	tro	SPA	troSPA-ooc	troooc	Pacific-open ocean
GS023	ooc	0.08	GS023-ooc-2	TropOoc	tro	SPA	troSPA-ooc	troooc	Pacific-open ocean
GS026	ooc	0.07	GS026-ooc-2	TropOoc	tro	SPA	troSPA-ooc	troooc	Pacific-open ocean
GS027	coa	0.07	GS027-coa-2.2	TropGala	tro	SPA	troSPA-coa	trocoa	Pacific-coastal
GS028	coa	0.07	GS028-coa-2	TropGala	tro	SPA	troSPA-coa	trocoa	Pacific-coastal
GS029	coa	0.08	GS029-coa-2.1	TropGala	tro	SPA	troSPA-coa	trocoa	Pacific-coastal
GS034	coa	0.08	GS034-coa-2.1	TropGala	tro	SPA	troSPA-coa	trocoa	Pacific-coastal
GS035	coa	0.08	GS035-coa-1.7	TropGala	tro	SPA	troSPA-coa	trocoa	Pacific-coastal
GS036	coa	0.08	GS036-coa-2.1	TropGala	tro	SPA	troSPA-coa	trocoa	Pacific-coastal
GS037	ooc	0.08	GS037-ooc-1.8	TropGala	tro	SPA	troSPA-ooc	troooc	Pacific-open ocean
GS047	ooc	0.07	GS047-ooc-30	TropGala	tro	SPA	troSPA-ooc	troooc	Pacific-open ocean

## Sheet: Sheet2
SAMPLE_NAME	SAMPLE_ACC
GS000b	JCVI_SMPL_1103283000002
GS000c	JCVI_SMPL_1103283000003
GS000d	JCVI_SMPL_1103283000004
GS001c	JCVI_SMPL_1103283000007
GS002	JCVI_SMPL_1103283000008
GS003	JCVI_SMPL_1103283000009
GS004	JCVI_SMPL_1103283000010
GS007	JCVI_SMPL_1103283000013
GS008	JCVI_SMPL_1103283000014
GS009	JCVI_SMPL_1103283000015
GS010	JCVI_SMPL_1103283000016
GS013	JCVI_SMPL_1103283000019
GS014	JCVI_SMPL_1103283000020
GS015	JCVI_SMPL_1103283000021
GS016	JCVI_SMPL_1103283000022
GS017	JCVI_SMPL_1103283000023
GS018	JCVI_SMPL_1103283000024
GS019	JCVI_SMPL_1103283000025
GS021	JCVI_SMPL_1103283000027
GS022	JCVI_SMPL_1103283000028
GS023	JCVI_SMPL_1103283000029
GS026	JCVI_SMPL_1103283000031
GS027	JCVI_SMPL_1103283000032
GS028	JCVI_SMPL_1103283000033
GS029	JCVI_SMPL_1103283000034
GS034	JCVI_SMPL_1103283000039
GS035	JCVI_SMPL_1103283000040
GS036	JCVI_SMPL_1103283000041
GS037	JCVI_SMPL_1103283000042
GS047	JCVI_SMPL_1103283000052

## Sheet: Sheet3
SAMPLE_NAME	NUM_OF_READS
GS007	50980
GS004	52959
GS003	61605
GS037	65670
GS047	66023
GS036	77538
GS010	78304
GS009	79303
GS001c	92351
GS026	101424
GS002	121590
GS022	121662
GS016	127122
GS015	127362
GS014	128885
GS008	129655
GS029	131529
GS021	131798
GS000b	132277
GS023	133051
GS034	134347
GS019	135325
GS013	138033
GS035	140814
GS018	142743
GS000d	164570
GS028	189052
GS000c	192643
GS027	222080
GS017	257581
